# Supplementary material
Source: publisher site journal article supplement (https://www.dovepress.com/article/545790)
Supplement: Supplementary file 1 [file 545790%20Supplementary%20file.docx]

**Supplementary Table S1 Architecture and hyperparameters of the FNN model.**

| **Category** | **Parameter** | **Value/Setting** |
| --- | --- | --- |
| **Network architecture** | Hidden layers | 3 |
|  | Units per hidden layer | 256 |
|  | Activation (hidden layers) | ReLU |
|  | Activation (output layer) | Sigmoid |
|  | Dropout | 0.3 (applied after 2nd & 3rd hidden layers) |
|  | Total trainable parameters | 134,401 |
| **Training** | Epochs | 20 |
|  | Batch size | 2048 |
|  | Training/validation split | 70% / 30% |
| **Optimization** | Loss function | Binary cross-entropy |
|  | Optimizer | Adam (learning rate = 0.01; minimum learning rate = 1×10⁻⁵) |
| **Class imbalance** | Class weights | Inverse class frequency(*wc* ∝ 1/*nc*) |
| **Callbacks** | Early stopping | Patience = 5 |
|  | Learning rate scheduling | ReduceLROnPlateau (factor = 0.2, patience = 3) |
|  | Model checkpointing | Enabled |
| **Reproducibility** | Random seed | Fixed in R |

Note: *wc* denotes the weight assigned to class *c*, where *nc* is the number of samples in class *c*. Class weights were defined inversely proportional to class frequency (*wc* ∝ 1/*nc*), ensuring that minority-class samples were given greater weight during model training.

**Supplementary Figure S1 Functional enrichment analysis of WGCNA module genes.**

**
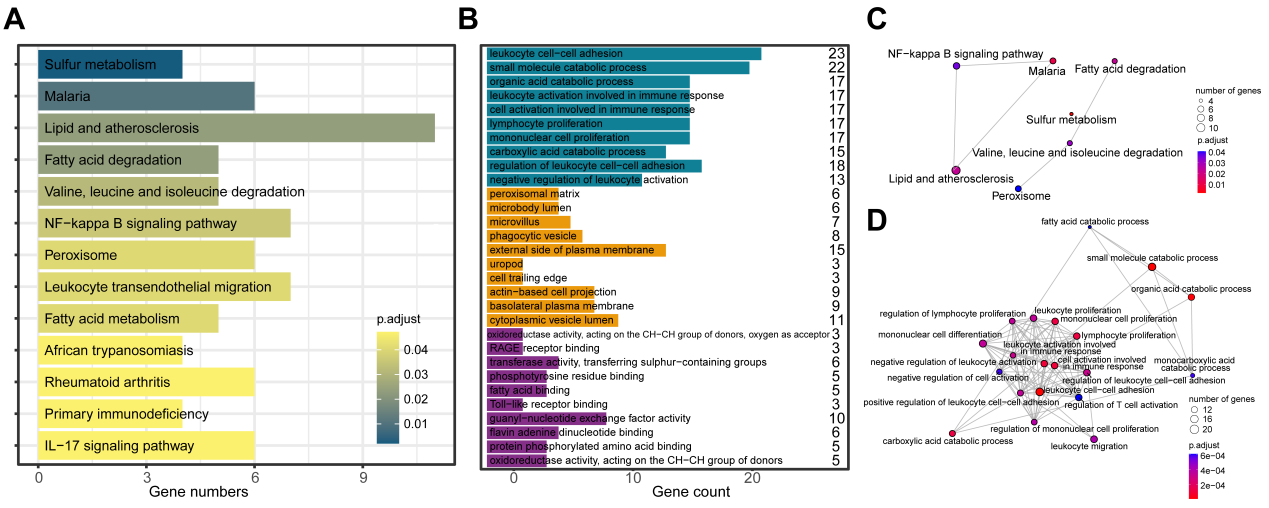
**
(**A**) Bar plot of significantly enriched KEGG pathways. (**B**) Bar plot of enriched GO terms in BP, CC, and MF categories. (**C**) KEGG network diagram showing pathway associations based on shared genes. (**D**) GO network diagram illustrating term significance, gene count, and gene overlap.

**Supplementary Figure S2** Functional enrichment analysis of candidate genes.


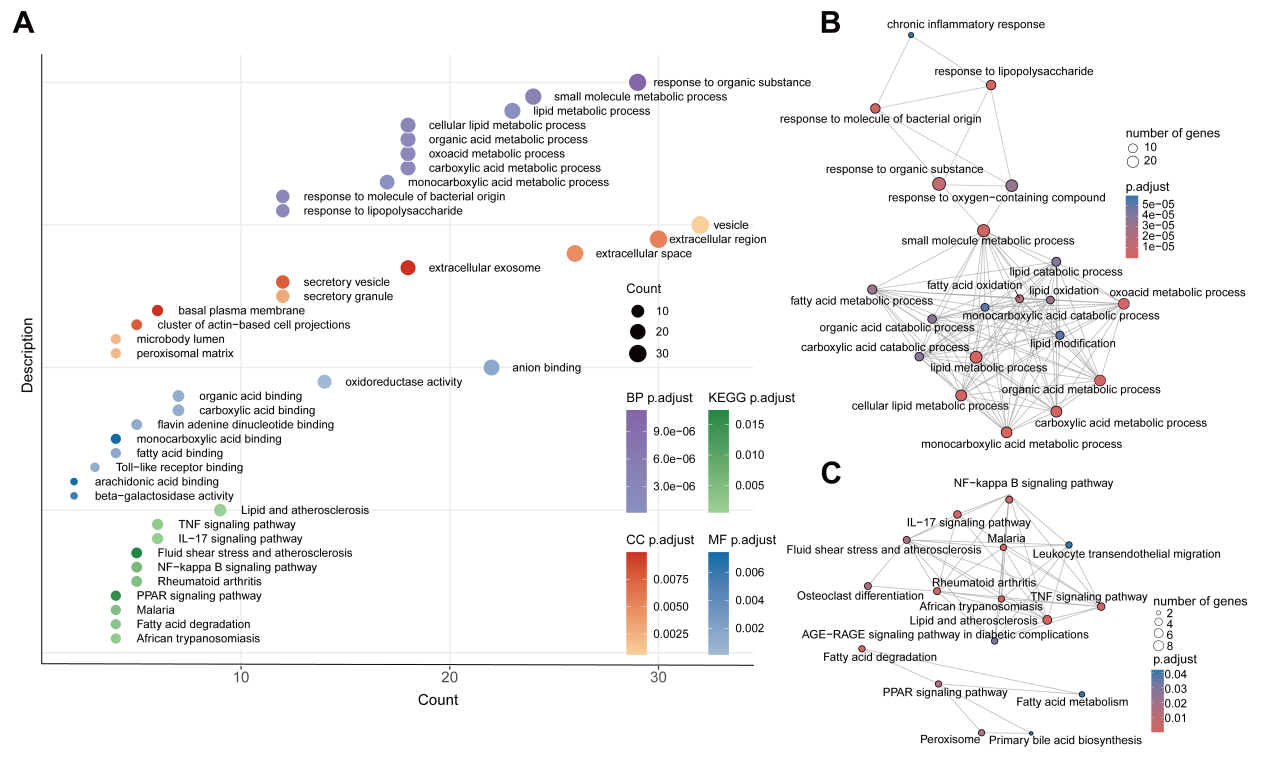


(**A**) Bubble plot showing GO (BP, CC, MF) terms and KEGG pathways significantly enriched in candidate genes.(**B**) GO network diagram illustrating functional relationships based on gene overlap.(**C**) KEGG pathway network revealing inter-pathway associations based on shared genes.

**Supplementary Figure S3** Bar charts of top SHAP contributors across datasets.


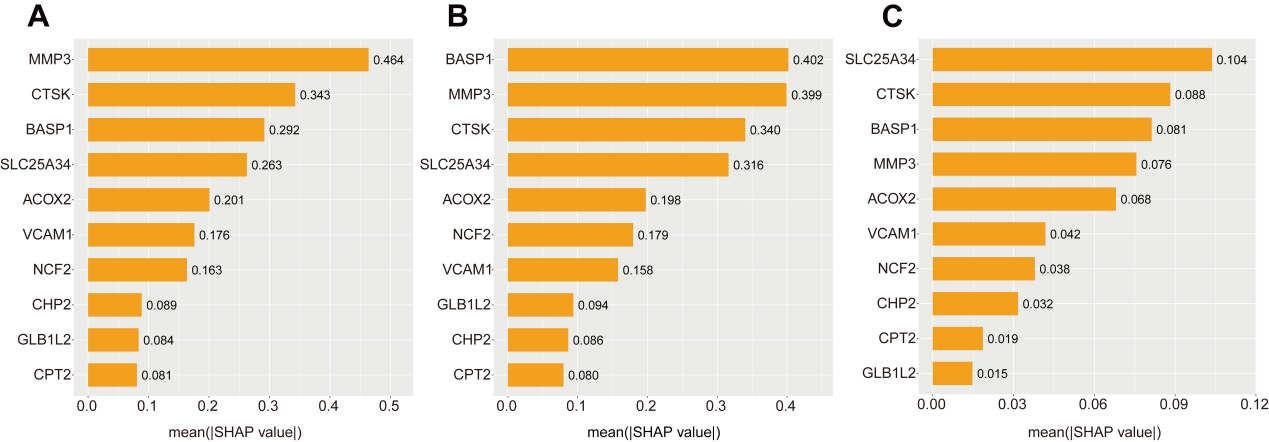


(**A**) Bar chart of top SHAP contributors in the external validation cohort GSE47908.(**B**) Bar chart of top SHAP contributors in the external validation cohort GSE75214.(**C**) Bar chart of top SHAP contributors in the integrated GEO datasets (GSE48959, GSE66407, GSE87466, GSE107499).

**Supplementary Figure S4** Confusion matrices of the FNN model across datasets.


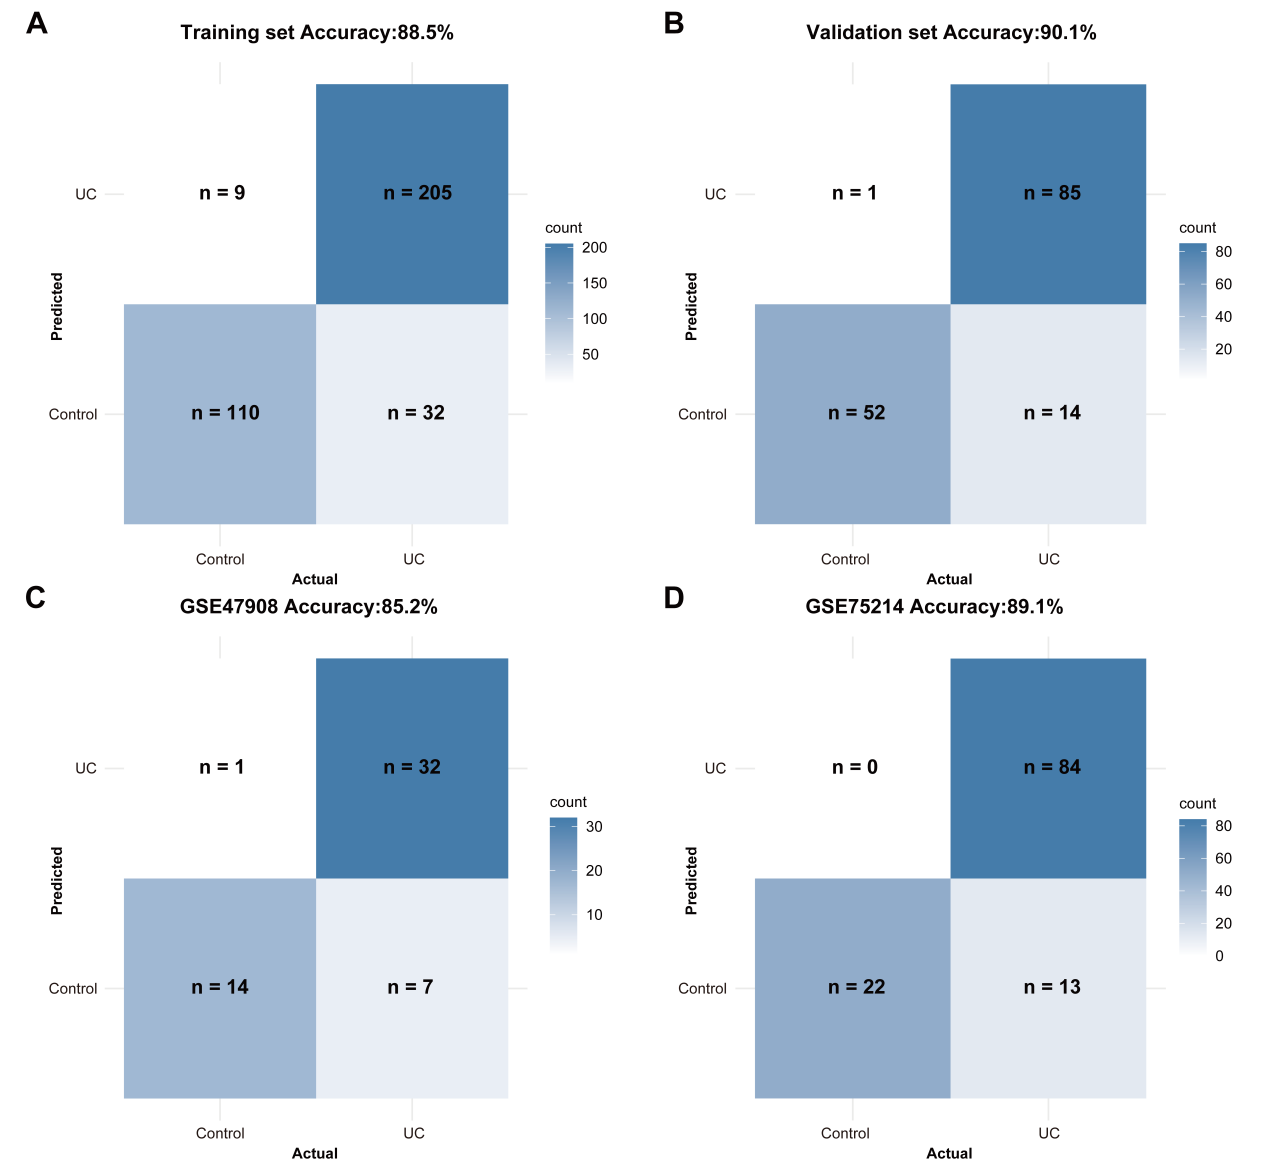


(**A**) Training set, (**B**) internal validation set, (**C**) external validation cohort GSE47908, and (**D**) external validation cohort GSE75214, showing predictive accuracy across datasets. Bold numerical values within each confusion matrix indicate the number of samples classified into the corresponding category.

**Supplementary Figure S5** Association between SLC25A34 expression and the immune microenvironment.


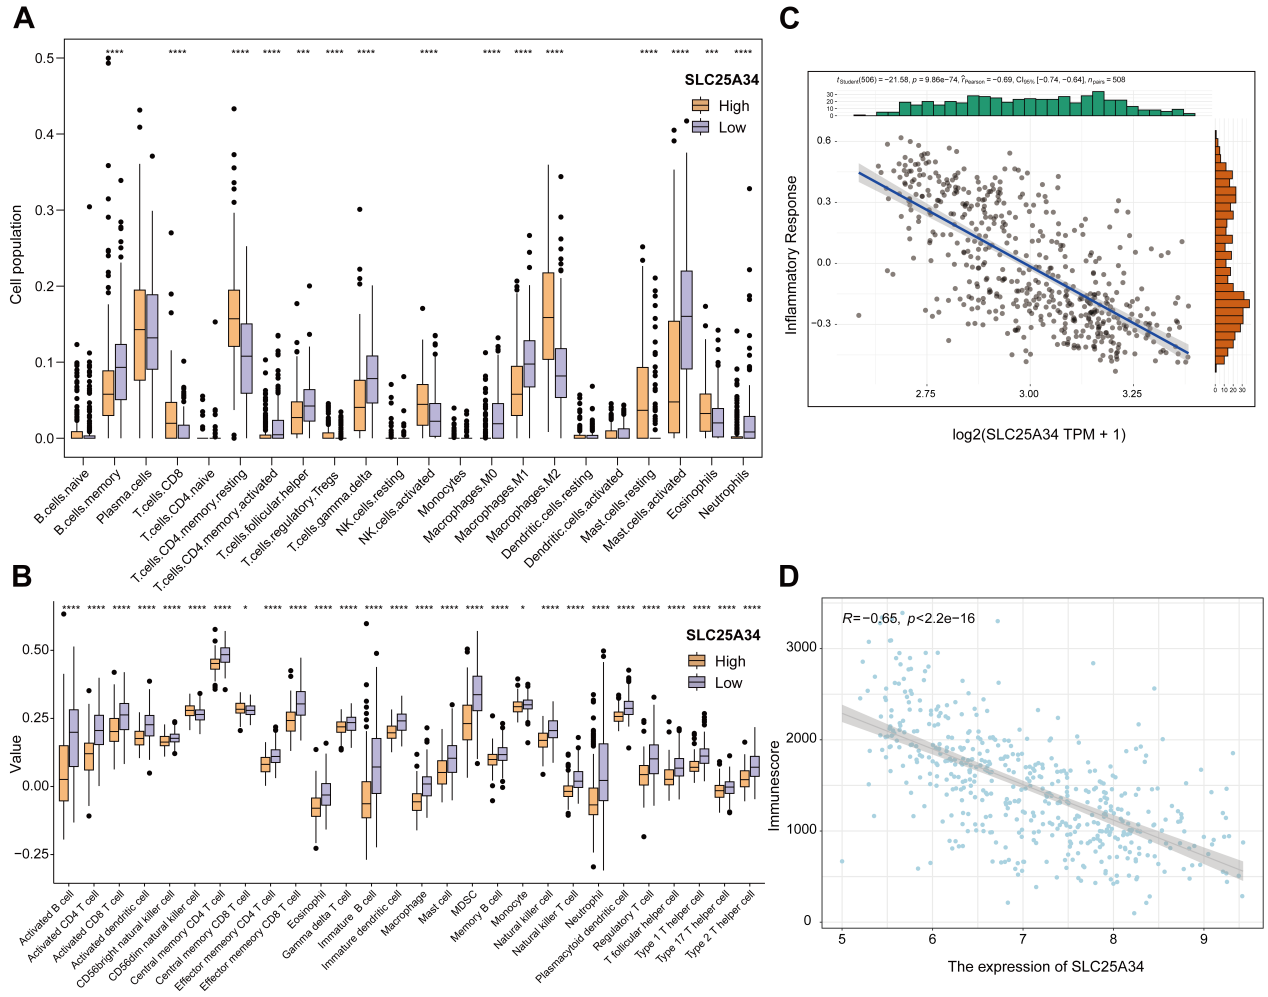


(**A**) Immune cell infiltration compared between high and low SLC25A34 expression groups. (**B**) Immune status scores compared between high and low SLC25A34 expression groups. (**C**) Correlation between SLC25A34 expression and inflammatory response score. (**D**) Correlation between SLC25A34 expression and immune score. Adjusted *P* values (Benjamini-Hochberg method) are indicated as *P* < 0.05 (*), < 0.001 (***), and < 0.0001 (****).

**Supplementary Figure S6** Association between GLB1L2 expression and the immune microenvironment.
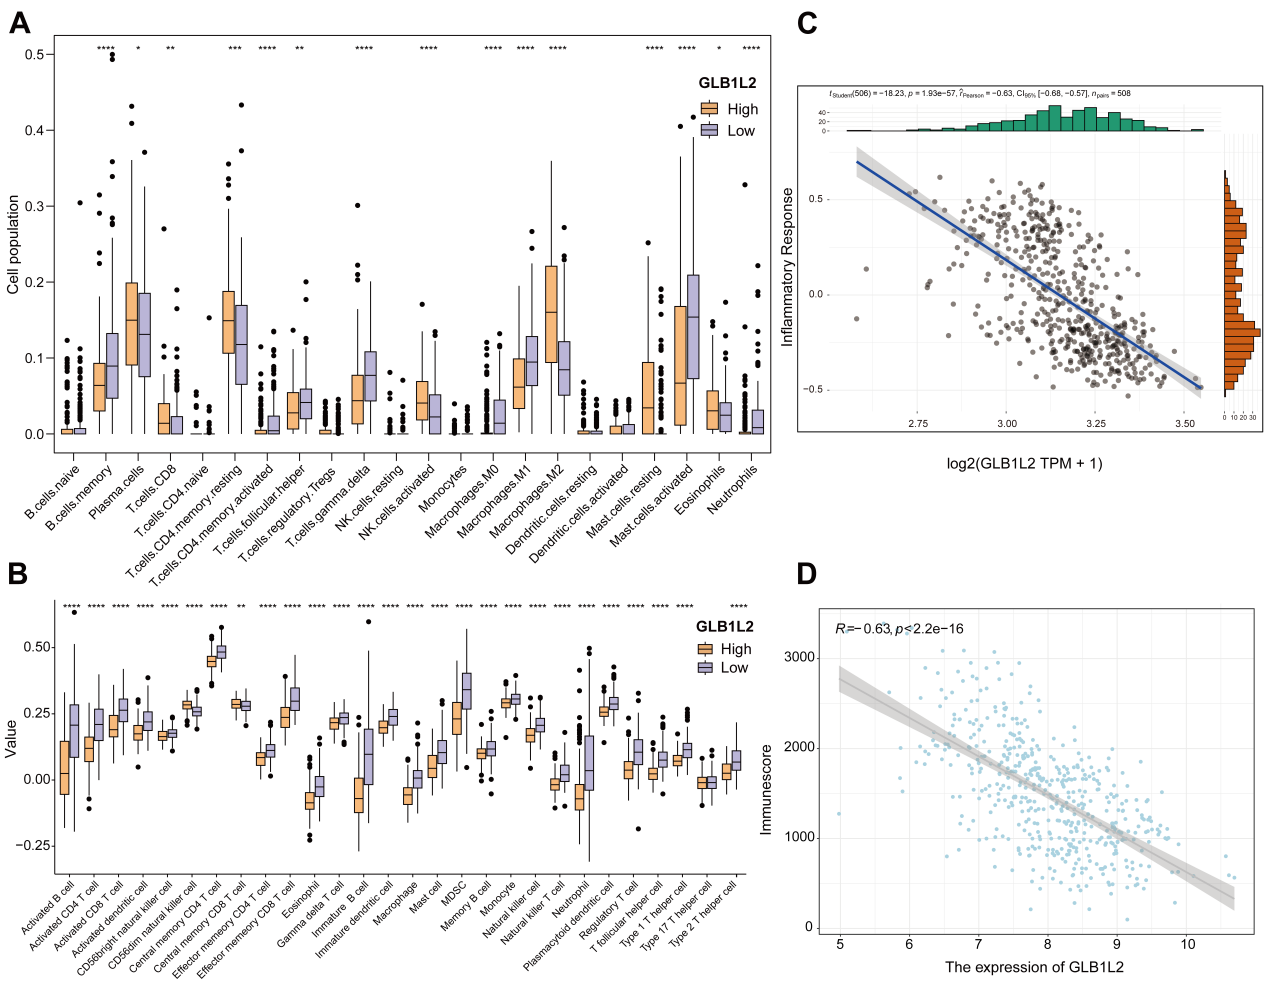


(**A**) Immune cell infiltration compared between high and low GLB1L2 expression groups. (**B**) Immune status scores compared between high and low GLB1L2 expression groups. (**C**) Correlation between GLB1L2 expression and inflammatory response score. (**D**) Correlation between GLB1L2 expression and immune score. Adjusted *P* values (Benjamini-Hochberg method) are indicated as *P* < 0.05 (*), < 0.01 (**), < 0.001 (***), and < 0.0001 (****).

**Supplementary Figure S7** Association between CHP2 expression and the immune microenvironment.
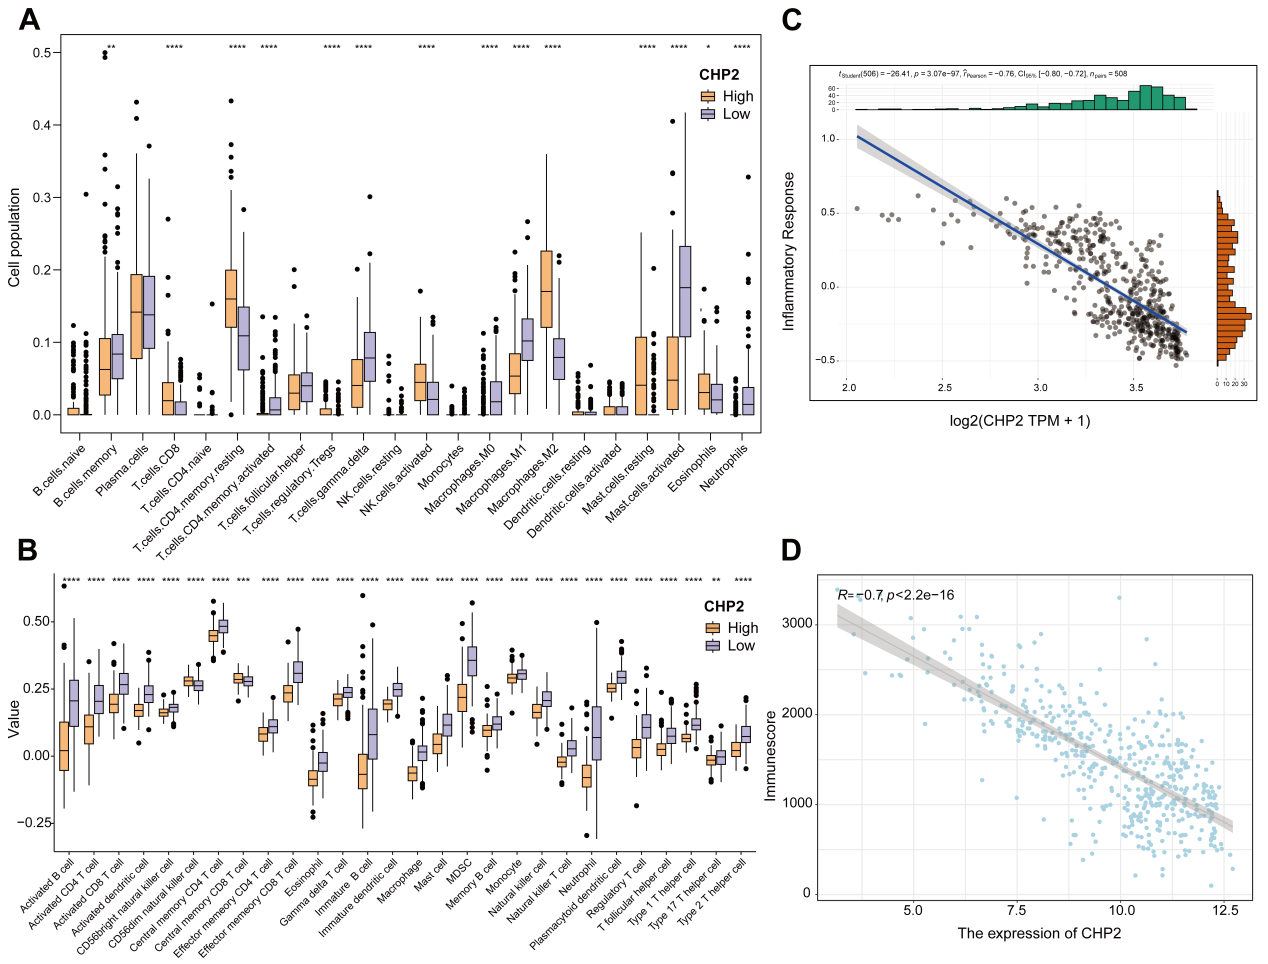


(**A**) Immune cell infiltration compared between high and low CHP2 expression groups. (**B**) Immune status scores compared between high and low CHP2 expression groups. (**C**) Correlation between CHP2 expression and inflammatory response score. (**D**) Correlation between CHP2 expression and immune score. Adjusted *P* values (Benjamini-Hochberg method) are indicated as *P* < 0.05 (*), < 0.01 (**), < 0.001 (***), and < 0.0001 (****).

**Supplementary Figure S8** Association between CPT2 expression and the immune microenvironment.


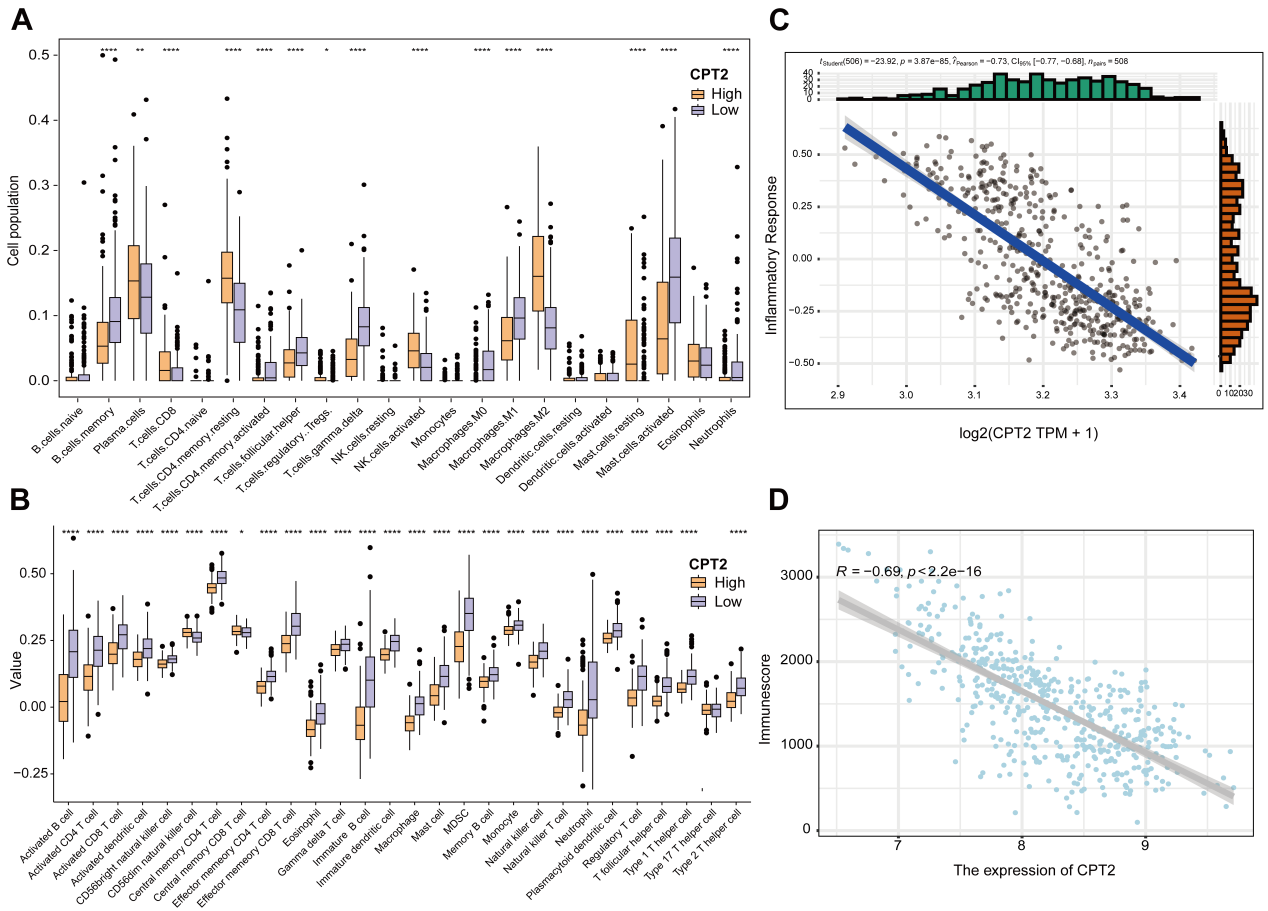


(**A**) Immune cell infiltration compared between high and low CPT2 expression groups. (**B**) Immune status scores compared between high and low CPT2 expression groups. (**C**) Correlation between CPT2 expression and inflammatory response score. (**D**) Correlation between CPT2 expression and immune score. Adjusted *P* values (Benjamini-Hochberg method) are indicated as *P* < 0.05 (*), < 0.01 (**), and < 0.0001 (****).

**Supplementary Figure S9** Association between ACOX2 expression and the immune microenvironment.


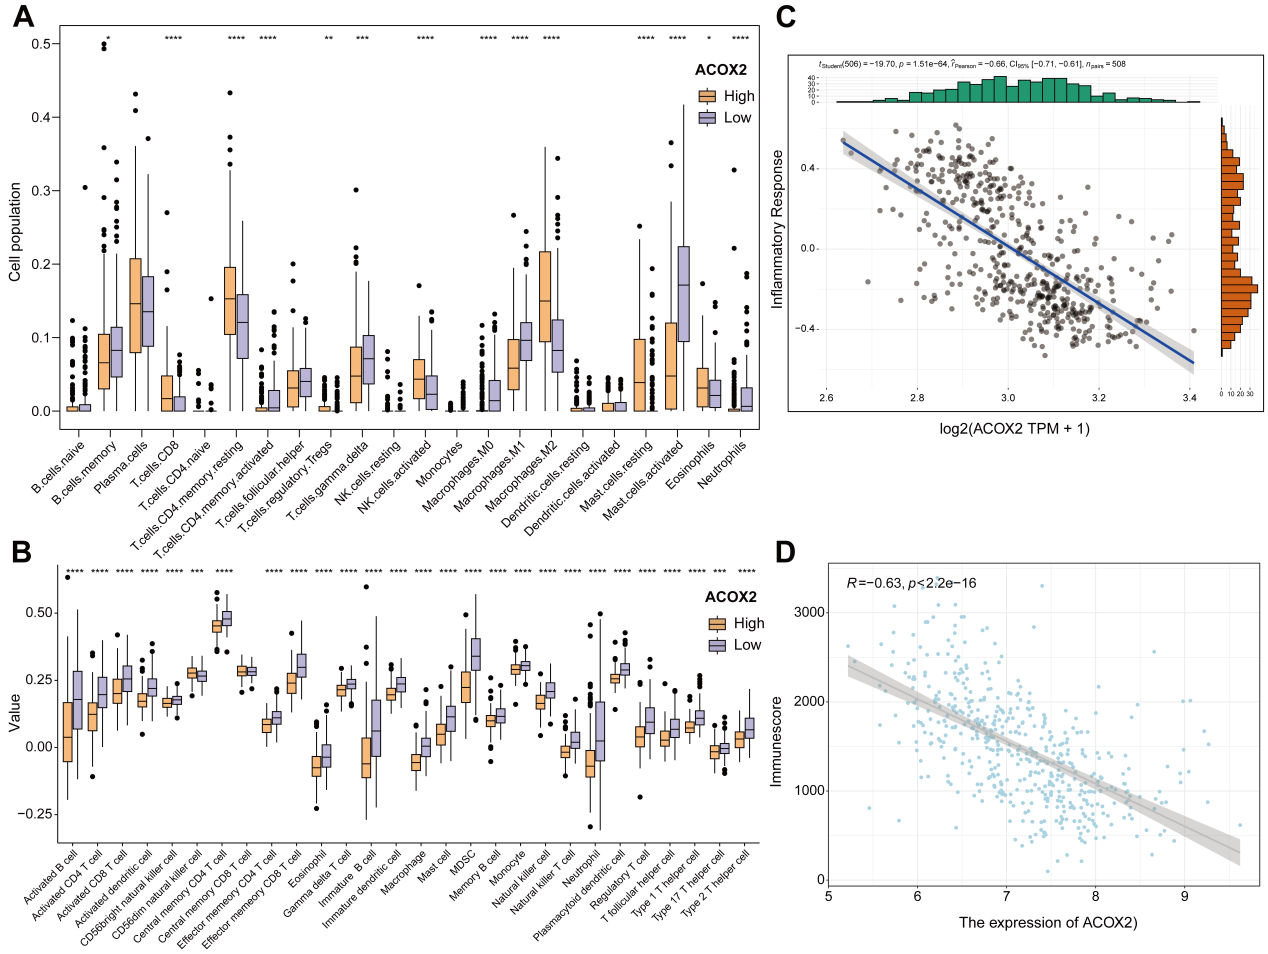


(**A**) Immune cell infiltration compared between high and low ACOX2 expression groups. (**B**) Immune status scores compared between high and low ACOX2 expression groups. (**C**) Correlation between ACOX2 expression and inflammatory response score. (**D**) Correlation between ACOX2 expression and immune score. Adjusted *P* values (Benjamini-Hochberg method) are indicated as *P* < 0.05 (*), < 0.01 (**), < 0.001 (***), and < 0.0001 (****).

**Supplementary Figure S10** Association between BASP1 expression and the immune microenvironment.


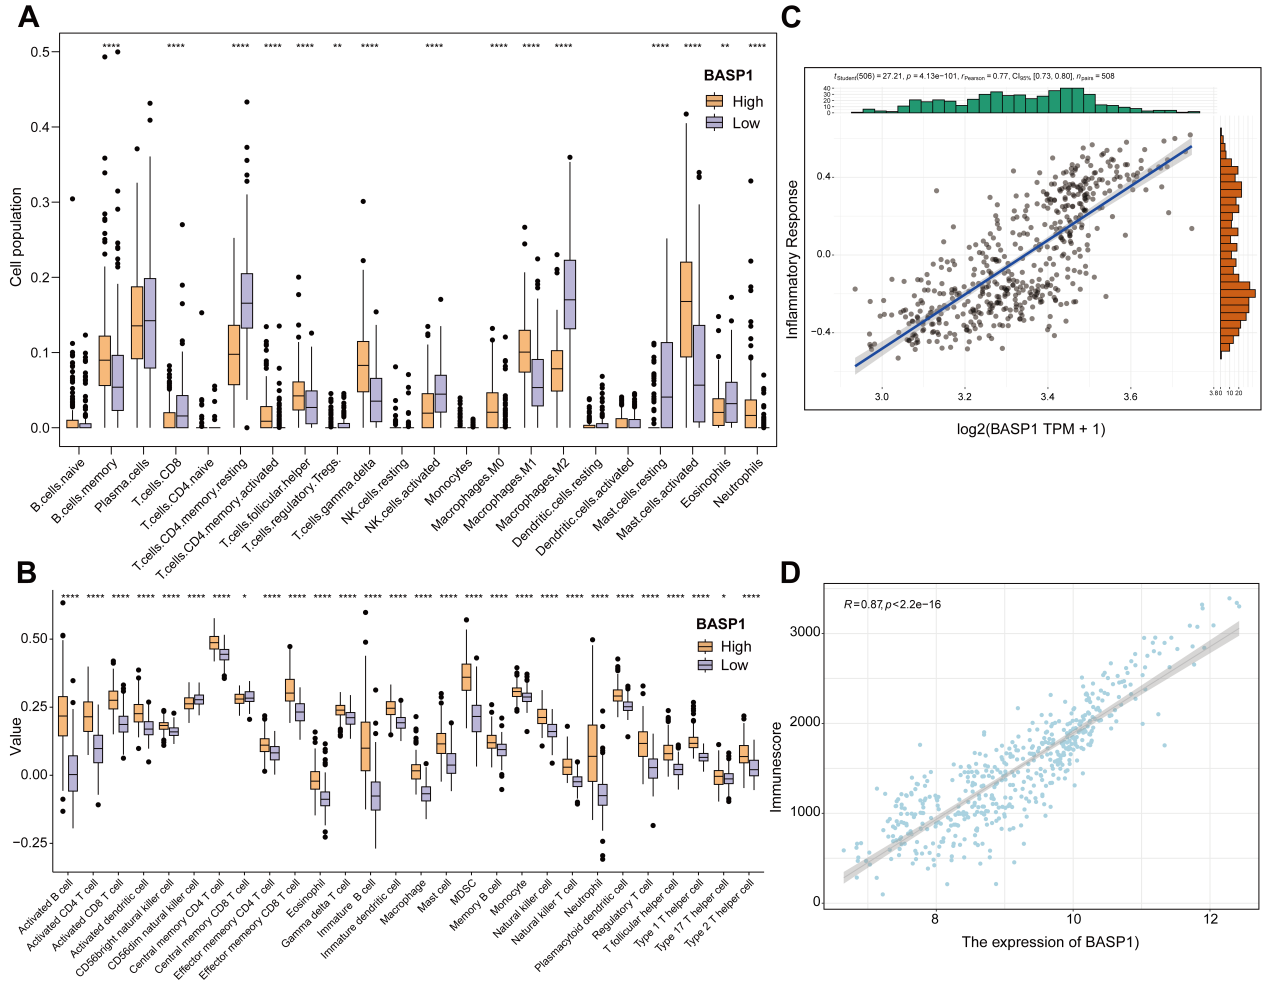


(**A**) Immune cell infiltration compared between high and low BASP1 expression groups. (**B**) Immune status scores compared between high and low BASP1 expression groups. (**C**) Correlation between BASP1 expression and inflammatory response score. (**D**) Correlation between BASP1 expression and immune score. Adjusted *P* values (Benjamini-Hochberg method) are indicated as *P* < 0.05 (*), < 0.01 (**), and < 0.0001 (****)

**Supplementary Figure S11** Association between VCAM1 expression and the immune microenvironment.


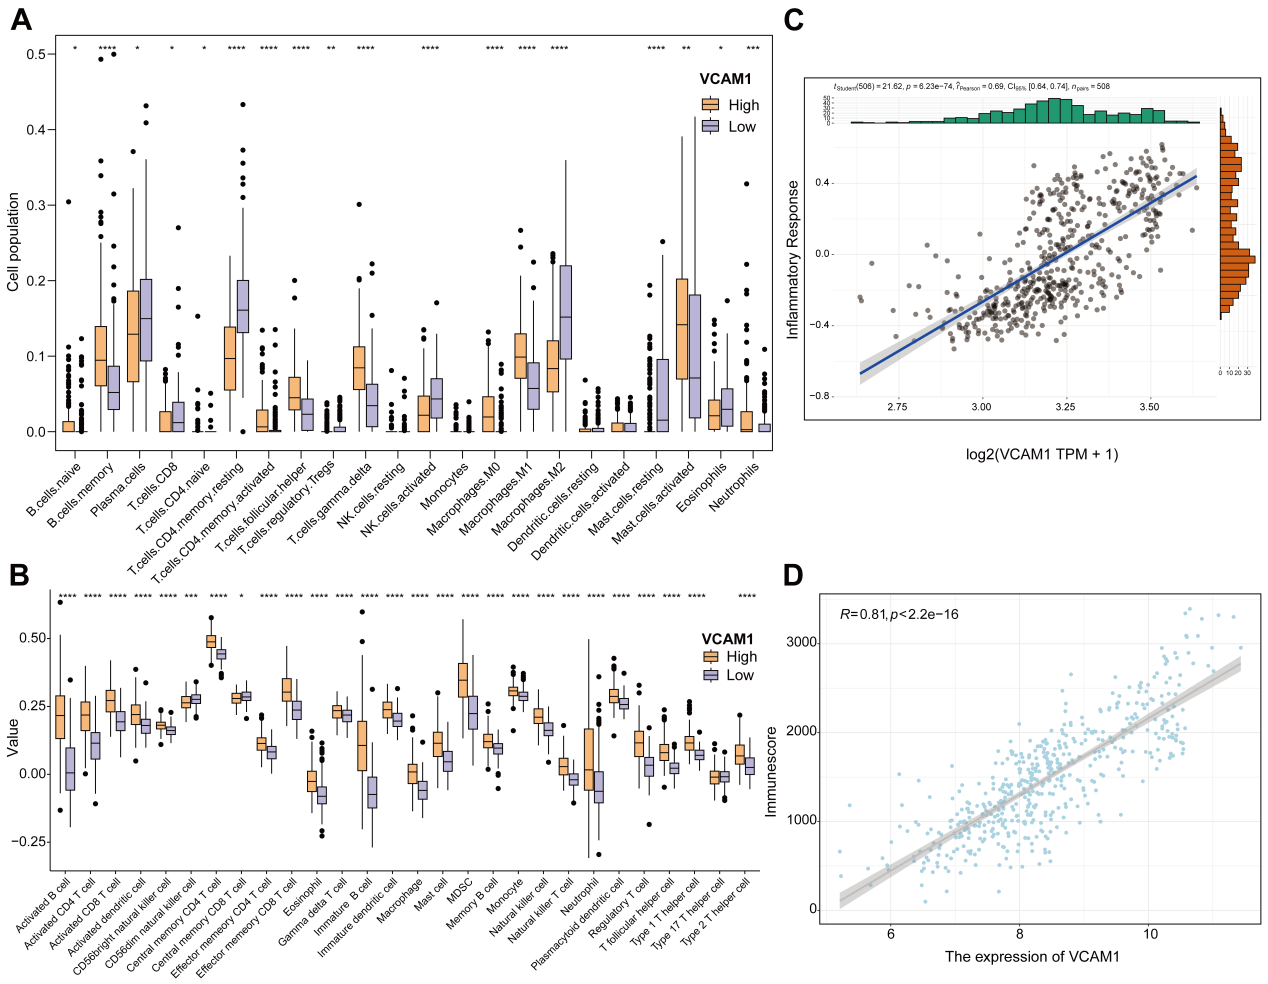


(**A**) Immune cell infiltration compared between high and low VCAM1 expression groups. (**B**) Immune status scores compared between high and low VCAM1 expression groups. (**C**) Correlation between VCAM1 expression and inflammatory response score. (**D**) Correlation between VCAM1 expression and immune score. Adjusted *P* values (Benjamini-Hochberg method) are indicated as *P* < 0.05 (*), < 0.01 (**), < 0.001 (***), and < 0.0001 (****).

**Supplementary Figure S12** Association between CTSK expression and the immune microenvironment.


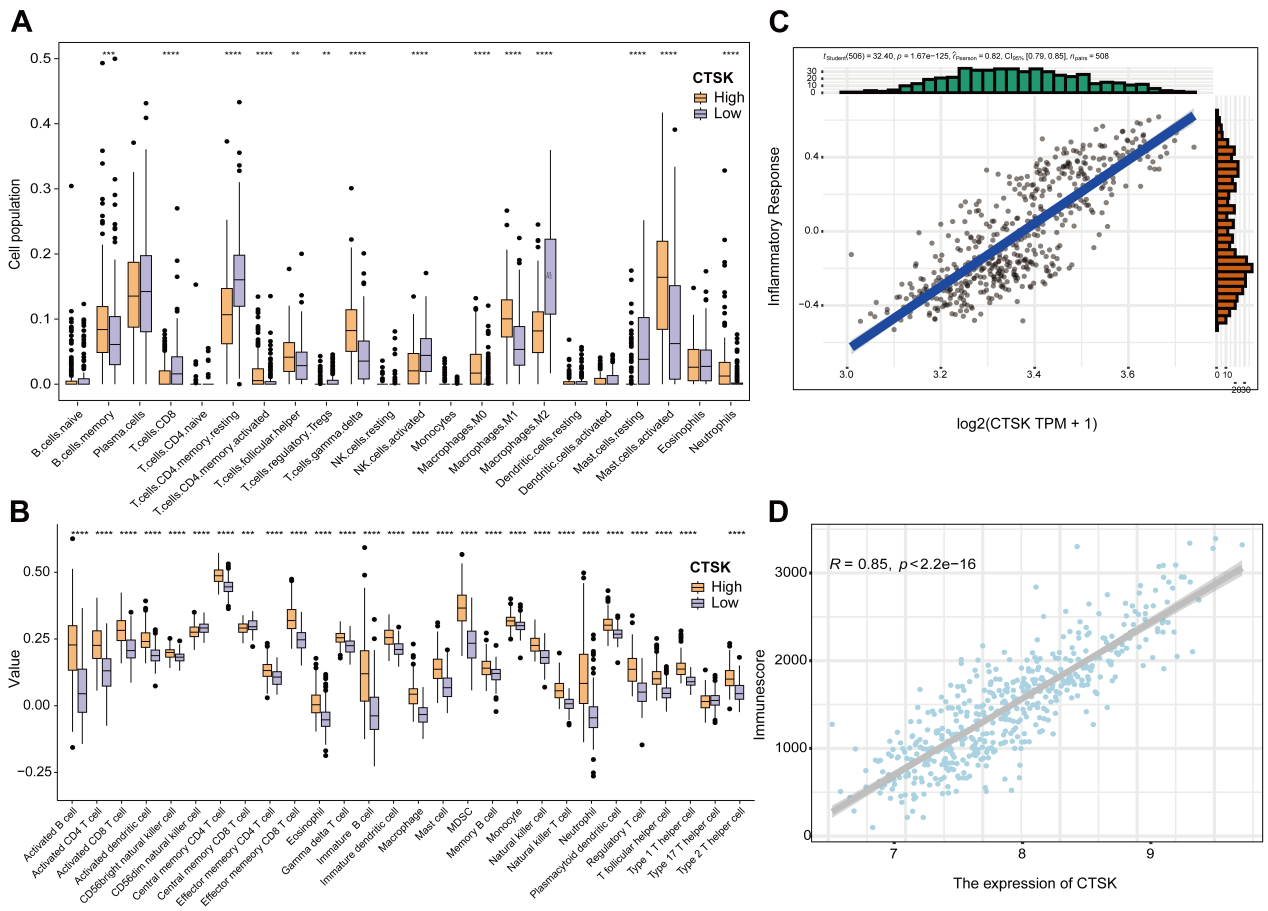


(**A**) Immune cell infiltration compared between high and low CTSK expression groups. (**B**) Immune status scores compared between high and low CTSK expression groups. (**C**) Correlation between CTSK expression and inflammatory response score. (**D**) Correlation between CTSK expression and immune score. Adjusted *P* values (Benjamini-Hochberg method) are indicated as *P* < 0.01 (**), < 0.001 (***), and < 0.0001 (****).

**Supplementary Figure S13** Association between MMP3 expression and the immune microenvironment.


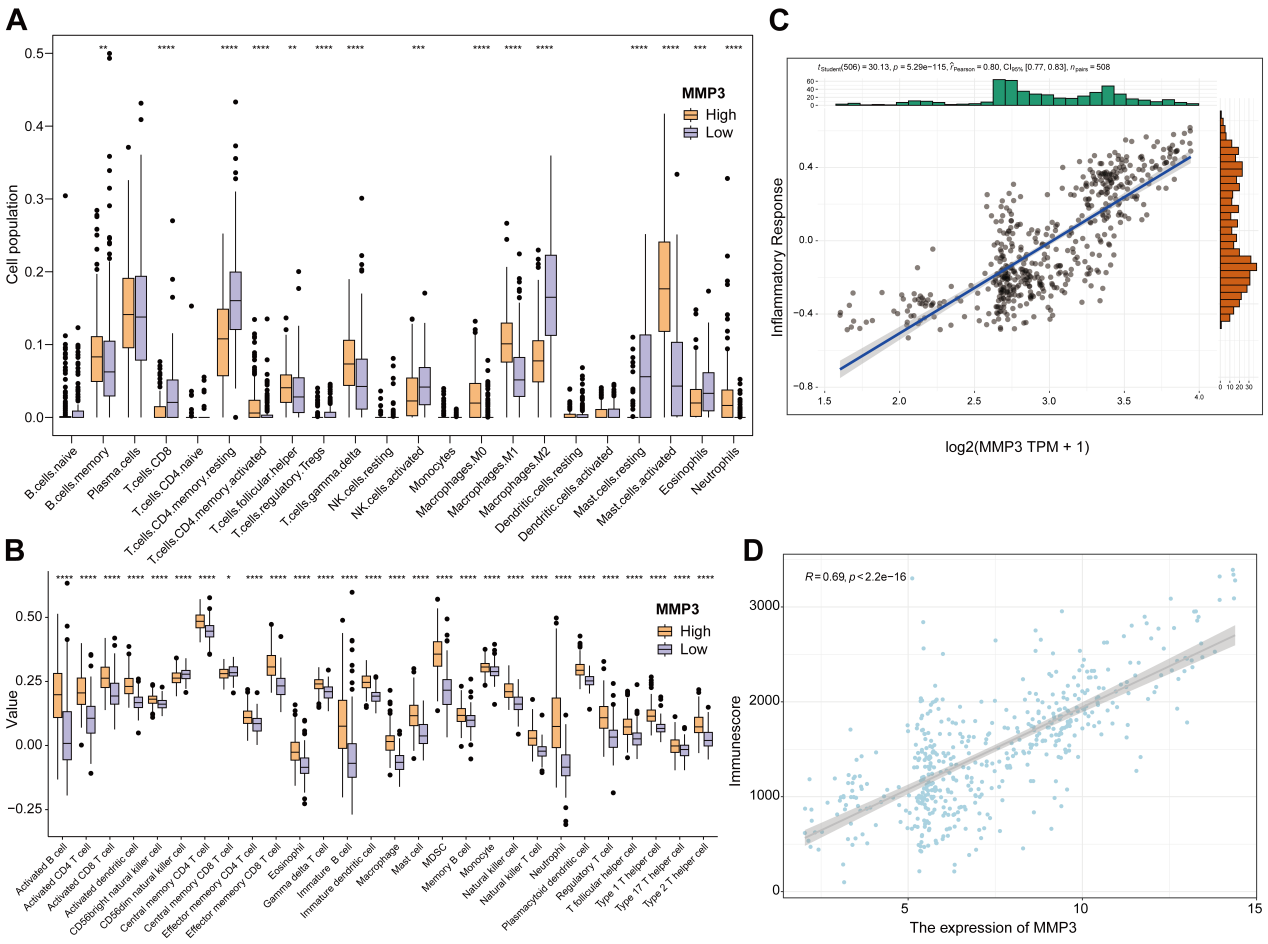


(**A**) Immune cell infiltration compared between high and low MMP3 expression groups. (**B**) Immune status scores compared between high and low MMP3 expression groups. (**C**) Correlation between MMP3 expression and inflammatory response score. (**D**) Correlation between MMP3 expression and immune score. Adjusted *P* values (Benjamini-Hochberg method) are indicated as *P* < 0.05 (*), < 0.01 (**), < 0.001 (***), and < 0.0001 (****).

**Supplementary Figure S14** Expression of 10 hub genes in 4 GEO and 2 validation datasets


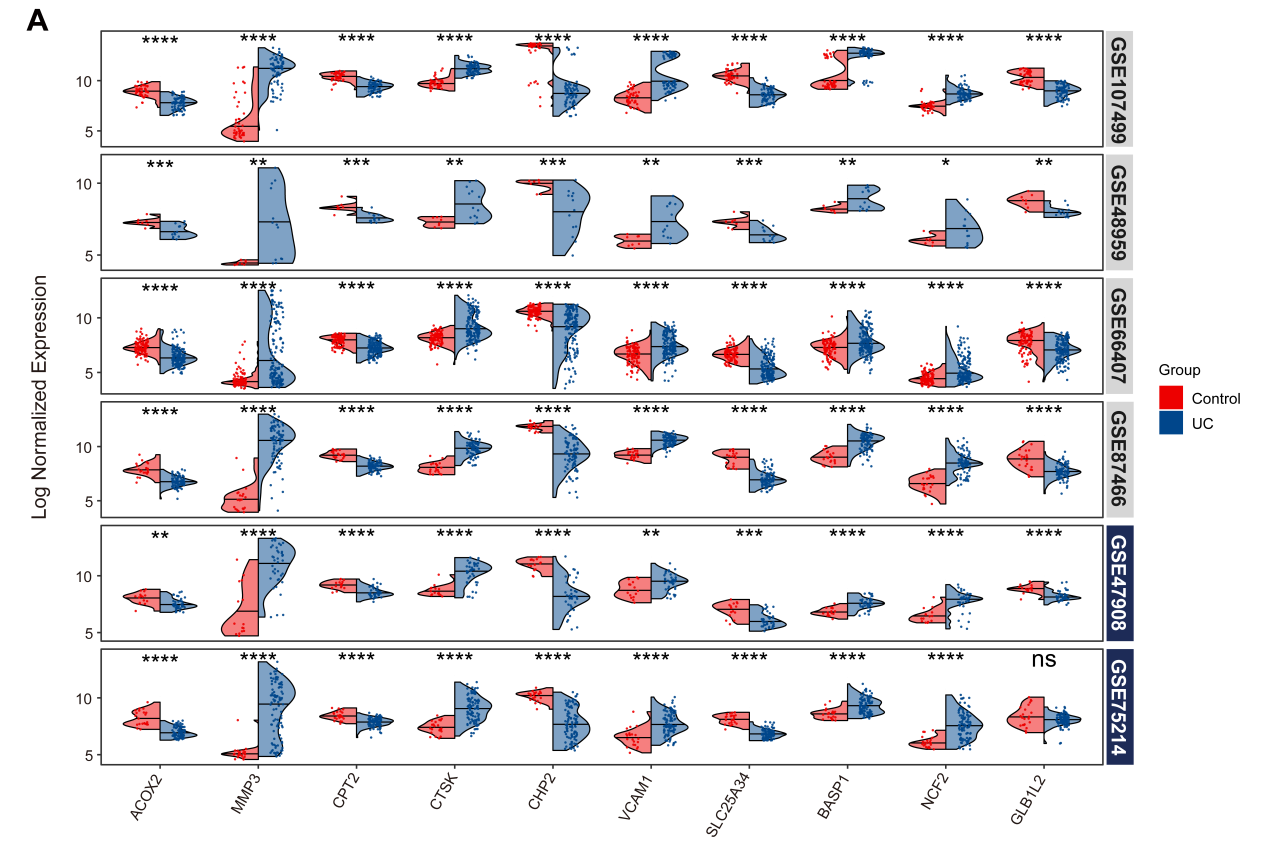


(**A**) Expression of 10 hub genes in UC and controls across four GEO and two validation datasets (Wilcoxon rank-sum test with Benjamini-Hochberg correction). Significance: *P* < 0.05 (*), < 0.01 (**), < 0.001 (***), < 0.0001 (****), ns = not significant.
